# Supplementary material for: Whole-body organ-level and kidney micro-dosimetric evaluations of 64Cu-loaded HER2/ErbB2-targeted liposomal doxorubicin (64Cu-MM-302) in rodents and primates
Source: PubMed Central journal article supplement (PMC4404468; doi:10.1186/s13550-015-0096-0), 2015-04-14
Supplement: 13550_2015_96_MOESM1_ESM.pdf [file 13550_2015_96_MOESM1_ESM.pdf]

**Table S1: Equations for kinetic model of <sup>64</sup>Cu signal in the kidney arising from liposomal <sup>64</sup>Cu**

| State Variable                                        | Equation                                                                                                                                                                                                                    |
|-------------------------------------------------------|-----------------------------------------------------------------------------------------------------------------------------------------------------------------------------------------------------------------------------|
| Total volume, kidney                                  | $V_{kidney,total} = V_{cap} + V_{tissue}$                                                                                                                                                                                   |
| <sup>64</sup> Cu concentration, blood                 | $\frac{d[Lipo64Cu]_{blood}}{dt} = -k_{el} \cdot [Lipo64Cu]_{blood} - Q \cdot [Lipo64Cu]_{blood} + Q \cdot [Lipo64Cu]_{cap} \cdot \frac{V_{cap}}{V_{blood}}$                                                                 |
| <sup>64</sup> Cu concentration, kidney vascular space | $\frac{d[Lipo64Cu]_{cap}}{dt} = Q \cdot [Lipo64Cu]_{blood} \cdot \frac{V_{blood}}{V_{cap}} - Q \cdot [Lipo64Cu]_{cap} - k_{in} \cdot [Lipo64Cu]_{cap} + k_{out} \cdot [Lipo64Cu]_{tissue} \cdot \frac{V_{tissue}}{V_{cap}}$ |
| <sup>64</sup> Cu concentration, kidney tissue         | $\frac{d[Lipo64Cu]_{tissue}}{dt} = k_{in} \cdot [Lipo64Cu]_{cap} \cdot \frac{V_{cap}}{V_{tissue}} - k_{out} \cdot [Lipo64Cu]_{tissue} - k_{rpu} \cdot [Lipo64Cu]_{tissue}$                                                  |
| <sup>64</sup> Cu concentration, renal pelvis          | $\frac{d[64Cu]_{rp}}{dt} = k_{rpu} \cdot [Lipo64Cu]_{tissue} \cdot \frac{V_{tissue}}{VF_{rp} \cdot V_{kidney,total}}$                                                                                                       |
| <sup>64</sup> Cu total signal, total kidney           | $64Cu_{kidney,total} = [Lipo64Cu]_{cap} \cdot V_{cap} + [Lipo64Cu]_{tissue} \cdot V_{tissue} + [64Cu]_{rp} \cdot VF_{rp} \cdot V_{kidney,total}$                                                                            |
| <sup>64</sup> Cu total signal, renal pelvis           | $64Cu_{rp,total} = [64Cu]_{rp} \cdot VF_{rp} \cdot V_{kidney,total} + ([Lipo64Cu]_{cap} \cdot V_{cap} + [Lipo64Cu]_{tissue} \cdot V_{tissue})VF_{rp}$                                                                       |

The model was implemented in MATLAB SimBiology R2014A (The Mathworks, Natick, MA). For questions, please contact Bart Hendriks (bhendriks@merrimackpharma.com).

**Table S2: Kinetic Model Parameter Descriptions**

| Parameter          | Description                                                                                                | Monkey Value                  | Human Value                   | Units | Reference                                                                                                                             |
|--------------------|------------------------------------------------------------------------------------------------------------|-------------------------------|-------------------------------|-------|---------------------------------------------------------------------------------------------------------------------------------------|
| $V_{blood}$        | Blood volume                                                                                               | 0.1                           | 4.875                         | L     | Estimated from 1-compartment PK estimates using imaging data; Lee, Lan Na (1998). "Volume of Blood in a Human". The Physics Factbook. |
| $V_{kidney,total}$ | Total kidney volume                                                                                        | 0.00487                       | 0.31                          | L     | Measured from imaging data; PMID: 8378254*                                                                                            |
| $V_{cap}$          | Kidney capillary volume                                                                                    | $0.34 \cdot V_{kidney,total}$ | $0.34 \cdot V_{kidney,total}$ | L     | NA                                                                                                                                    |
| $V_{tissue}$       | Kidney tissue volume                                                                                       | $V_{kidney,total} - V_{cap}$  | $V_{kidney,total} - V_{cap}$  | L     | NA                                                                                                                                    |
| $VF_{rp}$          | Fraction of total kidney volume that comprises the renal pelvis                                            | 0.1                           | 0.1                           | -     | Estimated from data                                                                                                                   |
| Q                  | Blood flow rate into/out of kidneys                                                                        | $5.52 \cdot V_{kidney,total}$ | $4 \cdot V_{kidney,total}$    | L/min | PMID: 8378254                                                                                                                         |
| $k_{el}$           | Elimination rate constant for liposome clearance from blood                                                | 0.000467                      | 0.000218                      | 1/min | Estimated from data; Doxil package insert                                                                                             |
| $k_{in}$           | Rate constant for liposomal deposition from kidney capillaries into kidney tissue                          | 2.55E-03                      | 2.55E-03                      | 1/min | Estimated from data                                                                                                                   |
| $k_{out}$          | Rate constant for liposomal washout from kidney tissue into kidney capillaries                             | 1.00E-03                      | 1.00E-03                      | 1/min | Estimated from data                                                                                                                   |
| $k_{rp}$           | Rate constant for renal pelvis uptake of <sup>64</sup> Cu from tissue deposited liposomal <sup>64</sup> Cu | 2.64E-04                      | 2.64E-04                      | 1/min | Estimated from data                                                                                                                   |

\*Tissue density was assumed to be 1 kg/L.

Squirrel monkey weight was assumed to be 0.5 kg.
