# Supplementary material for: Whole-body organ-level and kidney micro-dosimetric evaluations of 64Cu-loaded HER2/ErbB2-targeted liposomal doxorubicin (64Cu-MM-302) in rodents and primates
Source: PubMed Central journal article supplement (PMC4404468; doi:10.1186/s13550-015-0096-0), 2015-04-14
Supplement: 13550_2015_96_MOESM2_ESM.pdf [file 13550_2015_96_MOESM2_ESM.pdf]

**Table S3: Pharmacokinetic Parameters of MM-302 Liposomes**

| Parameter                     | MM-302          |
|-------------------------------|-----------------|
| $t_{1/2}$ (h)                 | 18.34 ± 2.90    |
| $T_{max}$ (h)                 | 1.00 ± 0.00     |
| $C_{max}$ (%ID/mL)            | 38.32 ± 1.98    |
| CL (mL/h)                     | 0.13 ± 0.02     |
| $V_{ss}$ (mL)                 | 3.37 ± 0.10     |
| $AUC_{(0-\infty)}$ (%ID/mL*h) | 772.68 ± 126.26 |
| $MRT_{(0-\infty)}$ (h)        | 26.07 ± 4.60    |

**Abbreviations:**  $t_{1/2}$ , effective radioactive half-life;  $T_{max}$ , Time to reach maximum concentration;  $C_{max}$ , maximum concentration; CL, clearance rate;  $V_{ss}$ , apparent volume of distribution at steady state;  $AUC_{(0-\infty)}$ , area under the time-activity curve from 0h to infinity;  $MRT_{(0-\infty)}$ , mean residence time.

**Table S4: Biodistribution of  $^{64}\text{Cu}$ -MM-302 in CD-1 mice**

| Tissue               | 0.5H          | 1H            | 4H           | 8H           | 22H         | 46H         |
|----------------------|---------------|---------------|--------------|--------------|-------------|-------------|
| Whole Blood          | 34.78 ± 3.55  | 36.29 ± 1.90  | 21.53 ± 1.14 | 14.32 ± 0.34 | 3.80 ± 0.40 | 0.40 ± 0.13 |
| Kidney               | 8.41 ± 0.86   | 9.90 ± 1.04   | 9.09 ± 0.94  | 7.32 ± 0.55  | 3.71 ± 0.50 | 0.81 ± 0.21 |
| Liver                | 6.95 ± 1.24   | 7.50 ± 1.07   | 6.64 ± 0.44  | 5.30 ± 0.42  | 2.95 ± 0.29 | 0.72 ± 0.16 |
| Lungs                | 7.78 ± 1.10   | 9.03 ± 1.58   | 6.17 ± 0.54  | 5.48 ± 0.78  | 2.60 ± 0.45 | 0.64 ± 0.08 |
| Spleen               | 7.49 ± 1.23   | 9.01 ± 3.06   | 7.85 ± 1.92  | 5.40 ± 0.37  | 2.37 ± 0.40 | 0.48 ± 0.13 |
| Adrenals             | 7.71 ± 0.56   | 8.15 ± 0.25   | 6.63 ± 1.36  | 5.80 ± 3.81  | 2.06 ± 0.23 | 0.55 ± 0.08 |
| Heart                | 5.49 ± 2.04   | 4.89 ± 0.38   | 3.74 ± 0.73  | 2.95 ± 0.43  | 1.61 ± 0.12 | 0.37 ± 0.03 |
| Uterus               | 2.33 ± 0.74   | 2.79 ± 1.28   | 3.66 ± 0.62  | 3.91 ± 2.06  | 1.60 ± 0.63 | 0.34 ± 0.11 |
| Ovaries              | 3.72 ± 0.58   | 2.93 ± 0.24   | 4.73 ± 1.15  | 1.90 ± 0.57  | 1.43 ± 0.36 | 0.26 ± 0.04 |
| Gallbladder          | 15.11 ± 18.39 | 13.54 ± 13.84 | 3.75 ± 1.17  | 3.30 ± 2.06  | 2.88 ± 1.47 | 1.17 ± 1.00 |
| Pancreas             | 2.11 ± 0.08   | 2.32 ± 0.21   | 1.39 ± 0.13  | 1.62 ± 0.14  | 0.86 ± 0.18 | 0.19 ± 0.01 |
| Stomach              | 1.09 ± 0.14   | 1.17 ± 0.15   | 1.54 ± 0.14  | 1.79 ± 0.17  | 1.40 ± 0.17 | 0.36 ± 0.01 |
| Small Intestine      | 1.49 ± 0.34   | 1.99 ± 0.32   | 2.61 ± 0.24  | 3.05 ± 0.55  | 1.88 ± 0.21 | 0.43 ± 0.09 |
| Large Intestine      | 0.83 ± 0.22   | 1.07 ± 0.21   | 1.44 ± 0.20  | 2.31 ± 0.16  | 1.63 ± 0.36 | 0.44 ± 0.04 |
| Bladder + Content    | 1.51 ± 0.39   | 1.31 ± 0.19   | 1.06 ± 0.18  | 0.91 ± 0.45  | 0.48 ± 0.04 | 0.15 ± 0.02 |
| Thymus               | 1.29 ± 0.31   | 1.92 ± 0.57   | 1.12 ± 0.23  | 0.90 ± 0.30  | 0.54 ± 0.07 | 0.14 ± 0.01 |
| Bone Marrow          | 2.18 ± 1.47   | 2.32 ± 0.54   | 1.61 ± 0.40  | 1.67 ± 0.70  | 0.77 ± 0.13 | 0.18 ± 0.04 |
| Bone                 | 0.78 ± 0.30   | 0.74 ± 0.26   | 0.93 ± 0.10  | 0.73 ± 0.10  | 0.21 ± 0.11 | 0.06 ± 0.02 |
| Muscle               | 0.57 ± 0.18   | 0.74 ± 0.03   | 0.68 ± 0.32  | 0.64 ± 0.13  | 0.25 ± 0.01 | 0.07 ± 0.01 |
| Brain                | 1.01 ± 0.11   | 0.87 ± 0.10   | 0.50 ± 0.03  | 0.35 ± 0.11  | 0.14 ± 0.00 | 0.04 ± 0.01 |
| Skin                 | 0.43 ± 0.10   | 0.69 ± 0.39   | 0.99 ± 0.46  | 0.90 ± 0.07  | 0.67 ± 0.15 | 0.18 ± 0.02 |
| White Adipose Tissue | 0.63 ± 0.11   | 0.66 ± 0.22   | 0.70 ± 0.26  | 0.72 ± 0.21  | 0.24 ± 0.10 | 0.15 ± 0.10 |
| Brown Adipose Tissue | 2.19 ± 0.58   | 3.27 ± 0.75   | 2.16 ± 0.52  | 1.24 ± 0.40  | 1.10 ± 0.05 | 0.41 ± 0.15 |

Data are expressed at % injected dose per gram (% ID/g ± SD, n = 3 mice at each time point) and are not decay corrected.
