# Supplementary material for: Whole-body organ-level and kidney micro-dosimetric evaluations of 64Cu-loaded HER2/ErbB2-targeted liposomal doxorubicin (64Cu-MM-302) in rodents and primates
Source: Springer Nature journal article supplement (doi:10.1186/s13550-015-0096-0), 2015-04-13

Figure S1: Autoradiography was performed to qualitatively measure relative  $^{64}\text{Cu}$  intensity in mouse kidney sections. The left image indicates the transversal slice and the right image indicates the coronal slice.

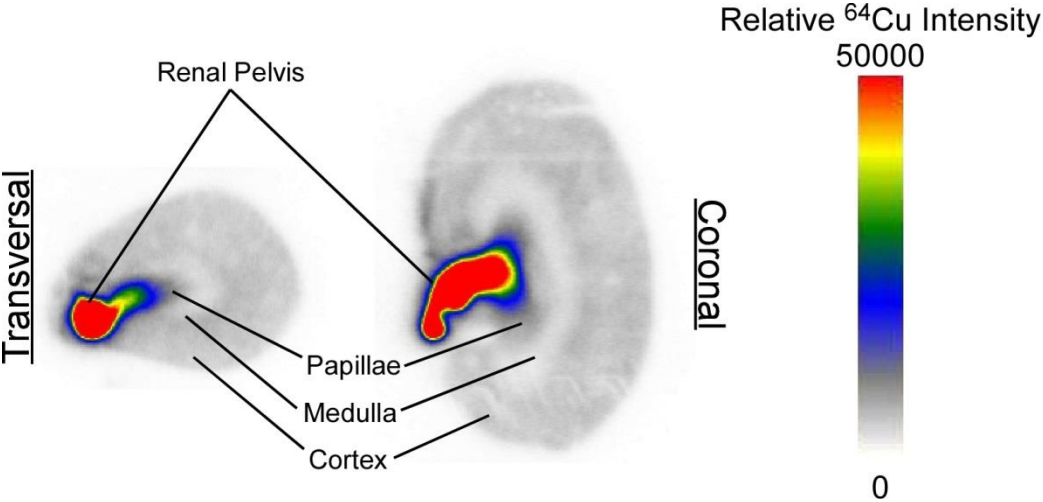

Supplement: MOESM3 [file 9786332]
