# Supplementary material for: Whole-body organ-level and kidney micro-dosimetric evaluations of 64Cu-loaded HER2/ErbB2-targeted liposomal doxorubicin (64Cu-MM-302) in rodents and primates
Source: Springer Nature journal article supplement (doi:10.1186/s13550-015-0096-0), 2015-04-13
Supplement: MOESM4 [file 9786332]

**Table S5: Comparison of Isotopes Useful for Radiolabeling Liposomes – Estimated Absorbed Radiation Dose in Liver, Based on Mice Injected with <sup>64</sup>Cu-MM-302**

| Isotope           | t <sub>1/2</sub> (h) | Imaging Modality | β- Energy (Abundance) <sup>a</sup> | β+ Energy (Abundance) <sup>a</sup> | γ Energy (Abundance) <sup>a</sup> | Estimated Absorbed Dose (mSv/MBq) <sup>b</sup> | Predicted Necessary Starting Activity (MBq) <sup>c</sup> | Estimated Radiation Dose for Predicted Starting Activity (mSv) <sup>c</sup> |
|-------------------|----------------------|------------------|------------------------------------|------------------------------------|-----------------------------------|------------------------------------------------|----------------------------------------------------------|-----------------------------------------------------------------------------|
| <sup>18</sup> F   | 1.8                  | PET              | n/a                                | 634 KeV (97%)                      | 511 KeV (194%)                    | 0.013                                          | 1.78e5                                                   | 2348                                                                        |
| <sup>99m</sup> Tc | 6.0                  | SPECT            | 293 KeV (100%)                     | n/a                                | 141 KeV (89%)                     | 0.003                                          | 349                                                      | 1                                                                           |
| <sup>64</sup> Cu  | 12.7                 | PET              | 578 KeV (37%)                      | 653 KeV (18%)                      | 511 KeV (35%)                     | 0.059                                          | 400                                                      | 24                                                                          |
| <sup>111</sup> In | 67.3                 | SPECT            | n/a                                | n/a                                | 245 KeV (94%)                     | 0.241                                          | 26                                                       | 6                                                                           |
| <sup>67</sup> Ga  | 78.2                 | SPECT            | n/a                                | n/a                                | 93 KeV (39%)                      | 0.159                                          | 134                                                      | 21                                                                          |
| <sup>89</sup> Zr  | 78.4                 | PET              | n/a                                | 396 KeV (23%)                      | 909 KeV (99%)                     | 0.811                                          | 134                                                      | 108                                                                         |
| <sup>186</sup> Re | 89.2                 | SPECT            | 1069 KeV (71%)                     | n/a                                | 137 KeV (9%)                      | 0.972                                          | 260                                                      | 253                                                                         |
| <sup>124</sup> I  | 100.3                | PET              | n/a                                | 1532 KeV (11%)<br>2135 KeV (11%)   | 603 KeV (63%)                     | 1.320                                          | 177                                                      | 50                                                                          |

<sup>a</sup>Isotope energies were taken from Holland, et al. 2010. Unconventional Nuclides for Radiopharmaceuticals. *Molecular Imaging*, 9(1) and Be, et al. 2013. Table of Radionuclides Vol 7, *Monographie BIPM-5*, and reflect the most abundant transition.

<sup>b</sup>Human absorbed radiation dose estimates for the selected isotopes were extrapolated from <sup>64</sup>Cu-MM-302 mouse biodistribution data.

<sup>c</sup>Starting activity for each isotope was predicted based on estimated activity remaining at 24h post-injection with <sup>64</sup>Cu-MM-302, adjusted for isotope energy efficiency, and estimate a starting activity that would be required to obtain sufficient image quality after 24h. For example, with a positron abundance of 18%, <sup>64</sup>Cu requires approximately 100 MBq of activity at 24h, or 400MBq starting activity, whereas <sup>18</sup>F, with a positron abundance of 97%, requires approximately 20MBq of activity at 24h, but a starting activity of approximately 178GBq due to its much shorter physical half-life.

**Table S6: Absorbed Radiation Doses in Primary Target Organs, Compared for <sup>64</sup>Cu-MM-302 and Approved Molecular Imaging Agents**

| Status         | Agent                                               | Target Organs          | Radiation Absorbed Dose (mSv/MBq) | Administered Activity (MBq) | Radiation Dose per Administered Activity (mSv) | Reference |
|----------------|-----------------------------------------------------|------------------------|-----------------------------------|-----------------------------|------------------------------------------------|-----------|
| Clinical Trial | <sup>64</sup> Cu-MM-302                             | Renal Pelvis           | 0.61                              | 400                         | 244                                            | Table 3   |
|                |                                                     | Heart Wall             | 0.53                              | 400                         | 210                                            | Table 2   |
| Approved       | BEXXAR ( <sup>131</sup> I-tositumomab)              | Thyroid                | 2.71                              | 185                         | 501                                            | [1]       |
|                |                                                     | Kidneys                | 1.96                              | 185                         | 363                                            |           |
|                |                                                     | Upper Large Intestines | 1.34                              | 185                         | 248                                            |           |
|                |                                                     | Lower Large Intestines | 1.30                              | 185                         | 241                                            |           |
|                |                                                     | Heart Wall             | 1.25                              | 185                         | 231                                            |           |
| Approved       | ProstaScint ( <sup>111</sup> In-Capromab pendetide) | Liver                  | 1.00                              | 185                         | 185                                            | [2]       |
|                |                                                     | Spleen                 | 0.88                              | 185                         | 163                                            |           |
| Approved       | <sup>111</sup> In-Oxyquinoline                      | Spleen                 | 10.81                             | 18.5                        | 200                                            | [3]       |
| Approved       | OctreoScan ( <sup>111</sup> In-Pentetreotide)       | Spleen                 | 0.67                              | 222                         | 148                                            | [4]       |
|                |                                                     | Kidneys                | 0.49                              | 222                         | 108                                            |           |

Information for approved imaging agents was derived from human dosimetry data presented in package inserts:

1. BEXXAR (131I-tositumomab) [Package Insert]. Wilmington (DE): GlaxoSmithKline; 2003.
2. ProstaScint (111In-Capromab Pendetide) [Package Insert]. Langhorne (PA): EUSA Pharma, Jazz Pharmaceuticals; 1996.
3. In-111 Oxyquinoline Solution [Package Insert]. Arlington Heights (IL): Amersham Health, Medi-Physics, Inc.; 1994.
4. OctreoScan (111In-Pentetreotide) [Package Insert]. St. Louis (MO): Mallinckrodt, Inc.; 1995.
